# Supplementary material for: Sex-specific effects of cooperative breeding and colonial nesting on prosociality in corvids
Source: eLife. 2020 Oct 20;9:e58139. doi: 10.7554/eLife.58139 (PMC7609055; doi:10.7554/eLife.58139)
Supplement: Figure 3—source data 1. [file elife-58139-fig3-data1.xlsx]

## Sheet: Sheet1
Azure-winged magpies - Group 1
							Label	Description
	All birds	All birds %		Criterion birds	Criterion birds %
M_to_M	21	42		21	42		M_to_M	Male bird providing to male bird
F_to_F	0	0		0	0		F_to_F	Female bird providing to female bird
M_to_F	1	2		1	2		M_to_F	Male bird providing to female bird
F_to_M	27	54		27	54		F_to_M	Female bird providing to male bird
Provided Food	49			49
Total Available Food	50			50			All birds	Number of food rewards provided by all birds
							All birds %	Percentage of food rewards (from all available food rewards) by all birds
Azure-winged magpies - Group 2
	All birds	All birds %		Criterion birds	Criterion birds %		Criterion birds	Number of food rewards provided by those birds that discriminated between the prosocial test and both control conditions
M_to_M	0	0		0	0		Criterion birds %	Percentage of food rewards (from all available food rewards) by those birds that discriminated between the prosocial test and both control conditions
F_to_F	5	10		0	0
M_to_F	32	64		32	64		Provided Food	Total number of provided food rewards
F_to_M	11	22		0	0		Total Available Food	Total number of available food rewards
Provided Food	48			32
Total Available Food	50			50
Carrion Crows
	All birds	All birds %		Criterion birds	Criterion birds %
M_to_M	0	0		0	0
F_to_F	25	41.6667		22	36.6667
M_to_F	0	0		0	0
F_to_M	12	20		12	20
Provided Food	37			34
Total Available Food	60			60
Eurasian jackdaws
	All birds	All birds %		Criterion birds	Criterion birds %
M_to_M	52	43.3333		34	28.3333
F_to_F	0	0		0	0
M_to_F	25	20.8333		5	4.16667
F_to_M	9	7.5		0	0
Provided Food	86			39
Total Available Food	120			120
Rooks
	All birds	All birds %		Criterion birds	Criterion birds %
M_to_M	0	0		0	0
F_to_F	0	0		0	0
M_to_F	1	1.66667		1	1.66667
F_to_M	7	11.6667		0	0
Provided Food	8			1
Total Available Food	60			60
Common ravens
	All birds	All birds %		Criterion birds	Criterion birds %
M_to_M	17	18.8889		0	0
F_to_F	8	8.88889		6	6.66667
M_to_F	7	7.77778		0	0
F_to_M	40	44.4444		13	14.4444
Provided Food	72			19
Total Available Food	90			90
New-Caledonian crows - Group 1
	All birds	All birds %		Criterion birds	Criterion birds %
M_to_M	0	0		0	0
F_to_F	0	0		0	0
M_to_F	22	73.3333		21	70
F_to_M	0	0		0	0
Provided Food	22			21
Total Available Food	30			30
